# Supplementary material for: Structural basis for phage-mediated activation and repression of bacterial DSR2 anti-phage defense system
Source: PubMed Central journal article supplement (PMC10981675; doi:10.1038/s41467-024-47177-9), 2024-03-30
Supplement: 41467_2024_47177_MOESM3_ESM.pdf [file 41467_2024_47177_MOESM3_ESM.pdf]

**File name: Supplementary Data 1**

**Description:** Primers used in this study.
